# Supplementary material for: Altered development of dopaminergic neurons differentiated from stem cells from human exfoliated deciduous teeth of a patient with Down syndrome
Source: PubMed Central journal article supplement (PMC6117917; doi:10.1186/s12883-018-1140-2), 2018-08-31
Supplement: 12883_2018_1140_MOESM2_ESM.pdf [file 12883_2018_1140_MOESM2_ESM.pdf]

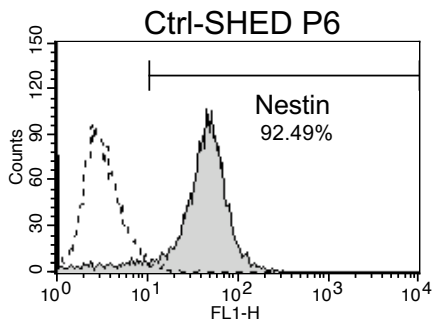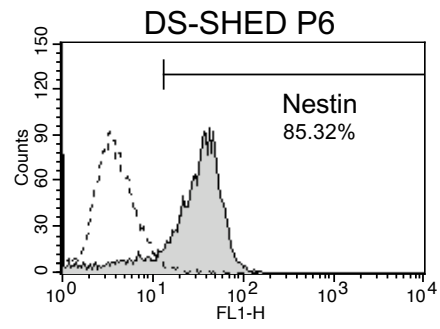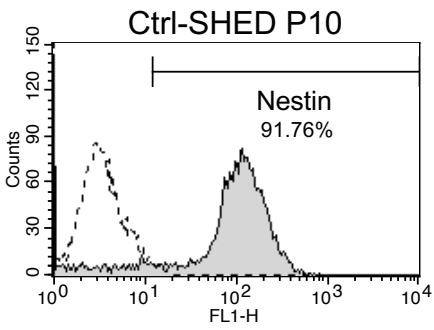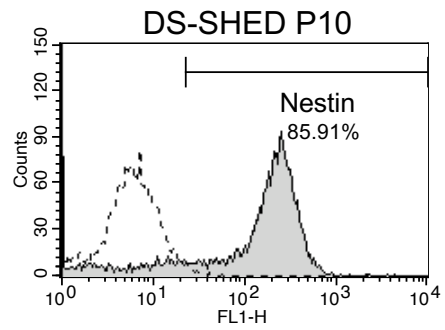

Fig. S2 Pham et al.
