# Supplementary material for: Altered development of dopaminergic neurons differentiated from stem cells from human exfoliated deciduous teeth of a patient with Down syndrome
Source: Springer Nature journal article supplement (doi:10.1186/s12883-018-1140-2), 2018-08-31
Supplement: MOESM3 [file 16089162]

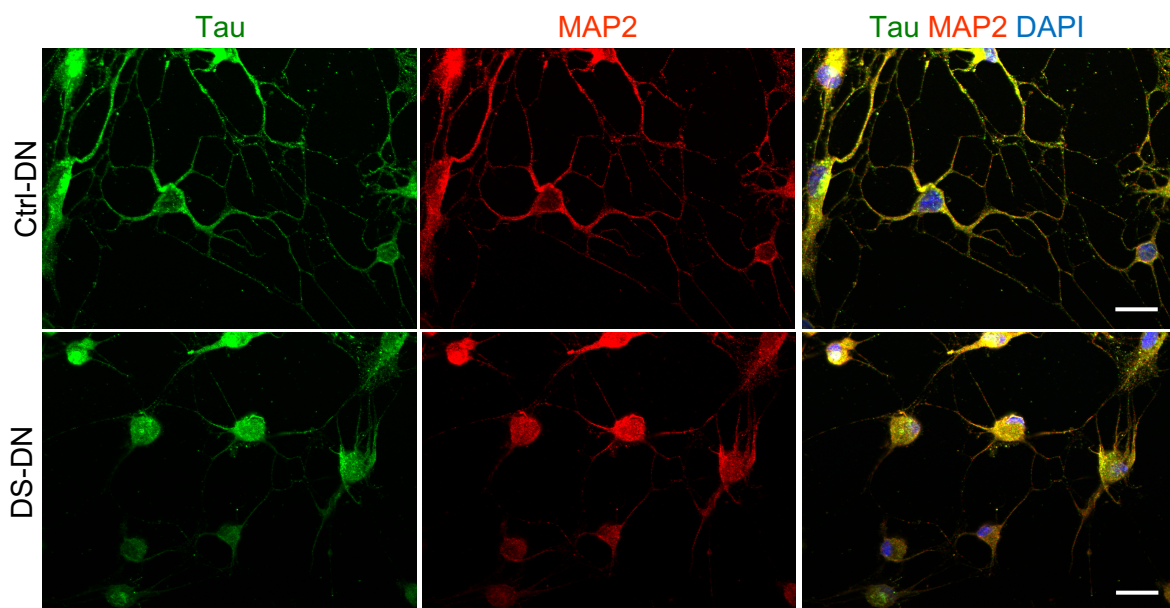

Fig. S3 Pham et al.
